# Supplementary material
Source: PubMed Central journal article supplement (PMC6085798)
Supplement: tpmd180077.SD1.pdf [file tpmd180077.SD1.pdf]

SUPPLEMENTAL TEXT

PRIMER SEQUENCES<sup>26†</sup>

PF3D7\_0501300 (ring)

Reverse: TTGCTAGGTAATATCCTTTTCTTTTCC  
Forward: GCAAACAAGCCGTACATGTTG

PF3D7\_1477700 (early-mid gametocytes)

Reverse: TTGGCCCACTGCTCTAGGA  
Forward: CTTATGTGCTGAATTTGTGTTATGGT

PF3D7\_1438800 (mid-late gametocytes)

Reverse: TCCCTGTGTTTTGCTCATCTTC  
Forward: GTTACATTTGACCCAGCATAAATT

---

<sup>†</sup> Primer sequences were taken from Joice et al.<sup>26</sup>
